# Supplementary material for: Pt–Y supported on magnesium–aluminium composite oxide catalysts for highly selective synthesis of 1,2-pentanediol from furfuryl alcohol under mild conditions
Source: Royal Society of Chemistry journal article supplement (doi:10.1039/d6ra02263d), 2026-05-05
Supplement: d6ra02263d1.pdf [file d6ra02263d1.pdf]

## SUPPORTING MATERIALS

**Pt-Y Supported on Magnesium-aluminum Composite Oxide Catalysts for Highly Selective Synthesis of 1,2-Pentanediol from Furfuryl Alcohol under Mild Conditions** Xiaodong Zhou <sup>a,b,c</sup>, Fengqin Guo, <sup>b,c</sup> Ziqiang Han, <sup>b,c</sup> Jiajun Zhang, <sup>b,c</sup> Yan Cao, <sup>b,c</sup> Huiquan Li, <sup>b,c</sup> Ligu Wang, <sup>a,b,c,\*</sup> Guozhu Chen<sup>a\*</sup>

<sup>a</sup> School of Chemistry and Chemical Engineering, University of Jinan, Jinan, 250022, China.

<sup>b</sup> CAS Key Laboratory of Green Process and Engineering, Institute of Process Engineering, Chinese Academy of Sciences, Beijing, 100190, China

<sup>c</sup> School of Chemical Engineering, University of Chinese Academy of Sciences, Beijing, 100049, China

\*Corresponding Author: lgwang@ipe.ac.cn (L.G. Wang), chm\_chengz@ujn.edu.cn (G.Z. Chen)

Mailing address: 1 North 2nd Street, Zhongguancun, Haidian District, Beijing 100190, China

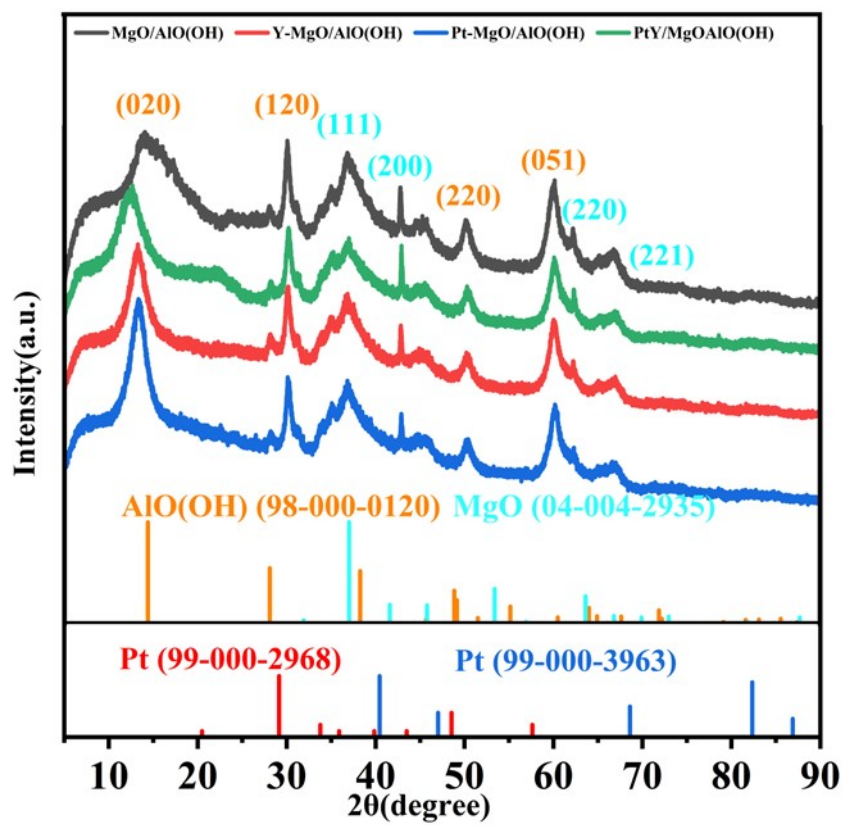

**Figure S1** XRD patterns of the series of MAO, Y/MAO, Pt/MAO, Pt-Y/MAO catalysts.

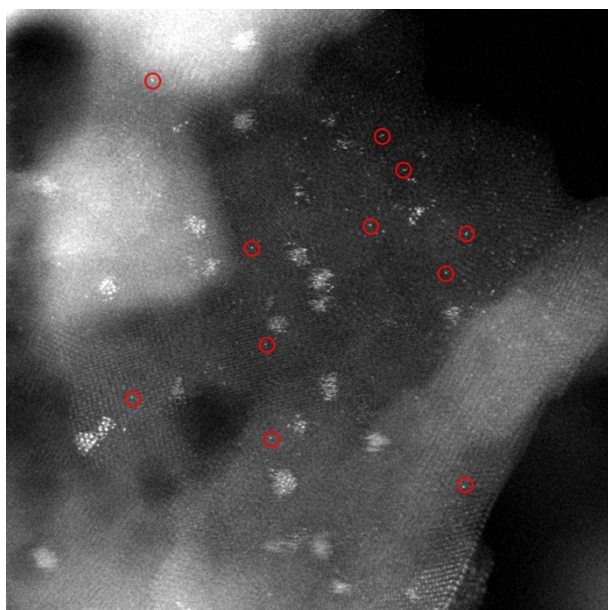

**Figure S2** AC-HAADF-STEM images of 0.75Pt-0.45Y/ MAO catalysts.

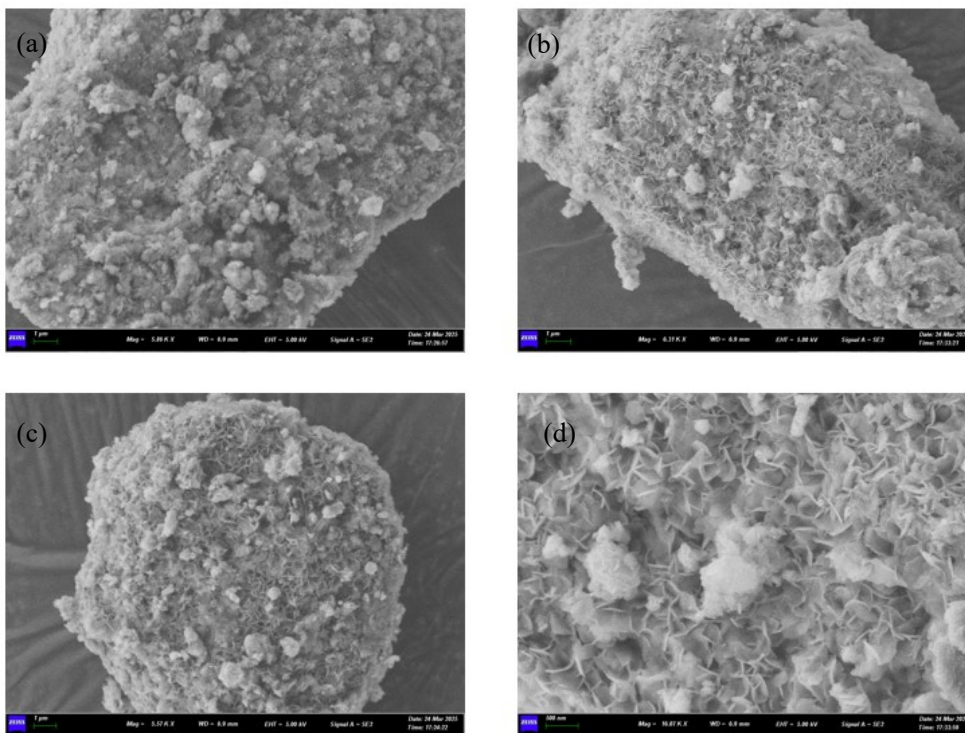

**Figure S3** (a) (c)SEM images of MAO and (b) (d) 0.75Pt-0.45Y/ MAO catalysts.

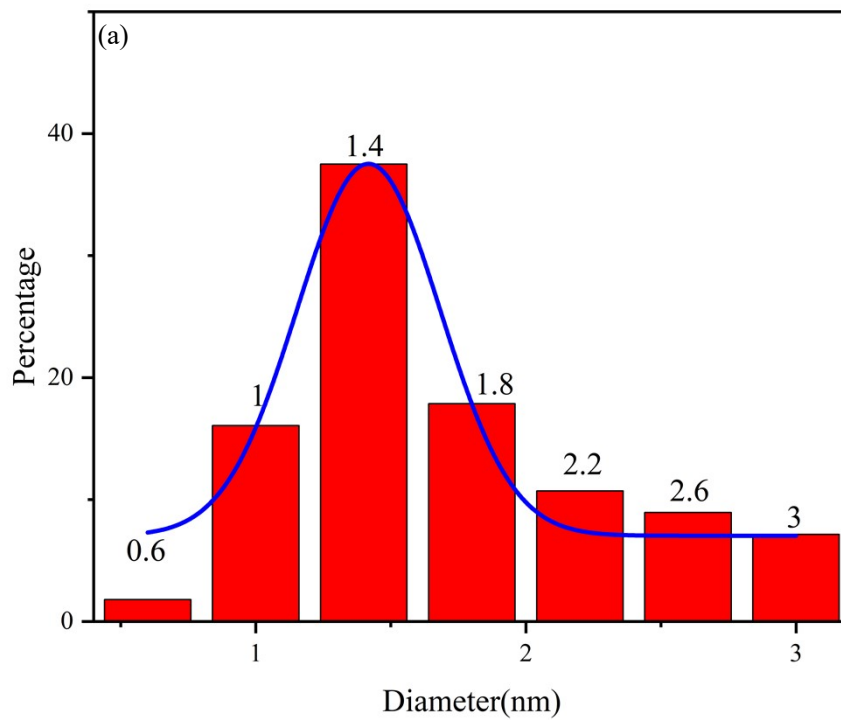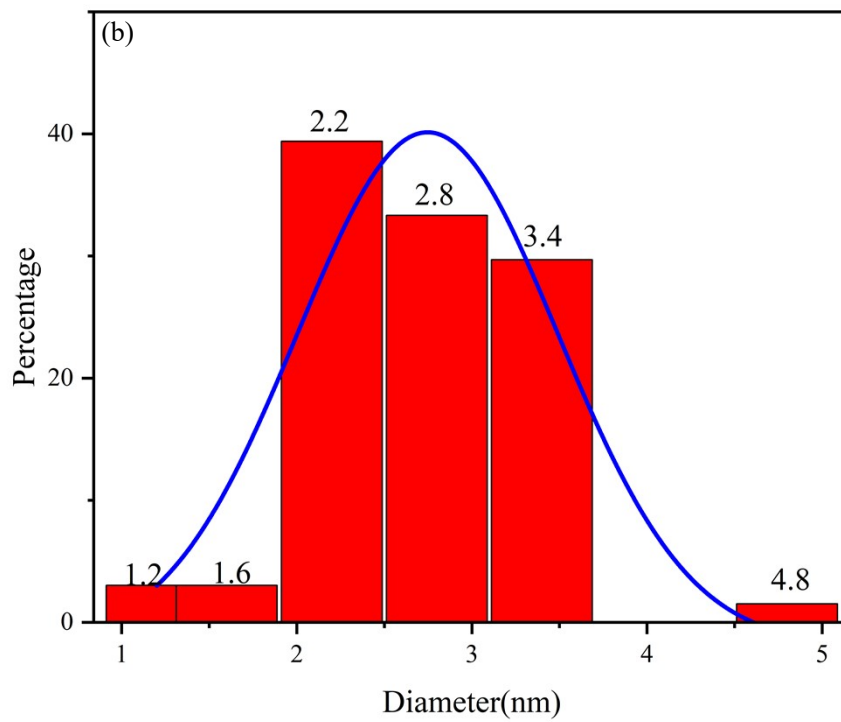

**Figure S4** Particle size statistics on 0.75Pt/MAO (a) and 0.75Pt-0.45Y/MAO (b) catalysts

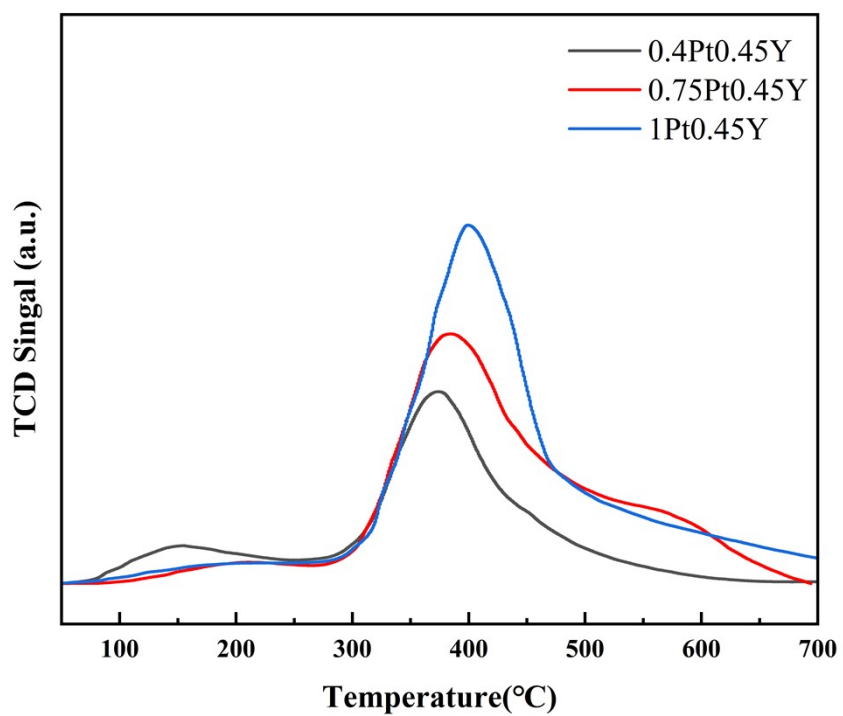

**Figure S5** The H<sub>2</sub>-TPD results of catalyst carriers with different Pt loading amounts

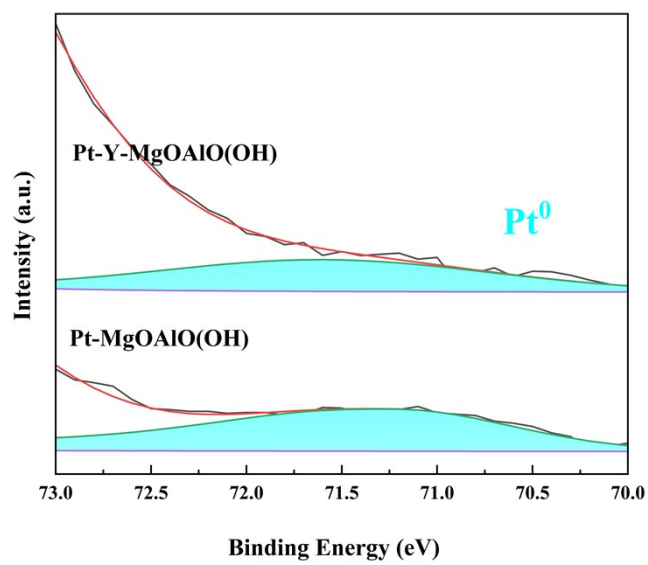

**Figure S6** XPS spectra of Pt 4f on Pt-Y/MAO and Pt/MAO catalysts

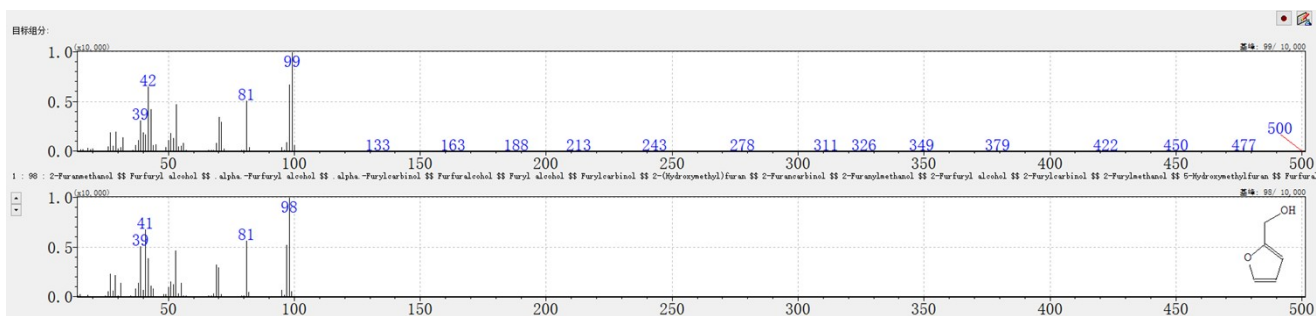

Figure S7 After stirring the furfuryl alcohol in  $D_2O$  for a period of time, the organic phase was taken for GC-MS analysis, and the results were obtained.

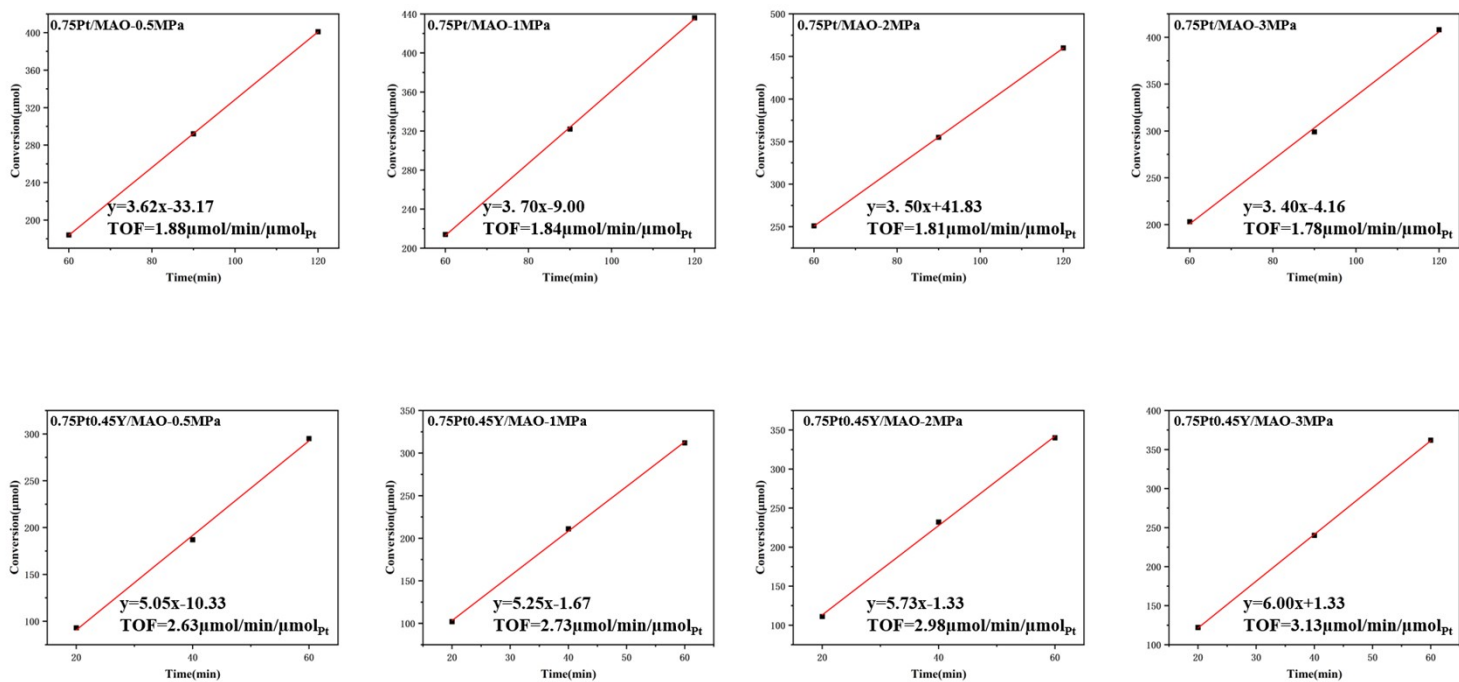

**Figure S8** TOF values under different reaction pressure over 0.75Pt/MAO and 0.75Pt0.45Y/MAO catalysts. Reaction conditions: 50 mg of 0.75Pt/MAO or 50 mg of 0.75Pt0.45Y/MAO catalyst, 140 °C. For the hydrogen pressure effect: 0.1 g of FFA in 4 g of water,  $P_{H_2}$ : 0.5, 1, 2, 3 MPa

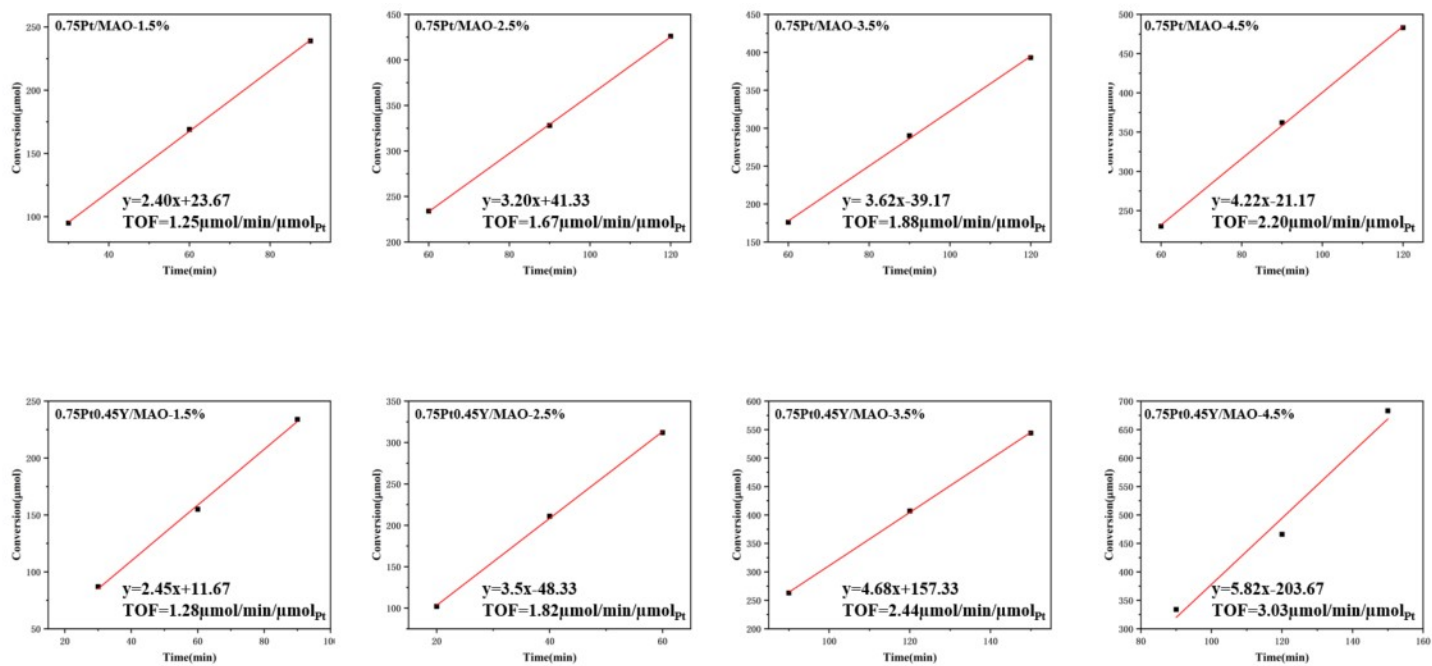

**Figure S9** TOF values under different FFA concentration over 0.75Pt/MAO and 0.75Pt0.45Y/MAO catalysts. Reaction conditions: 50 mg of 0.75Pt/MAO or 50 mg of 0.75Pt0.45Y/MAO catalyst, 4 g of water, 1MPa H<sub>2</sub>, C<sub>FFA</sub>: 1.5%, 2.5%, 3.5%, 4.5%.

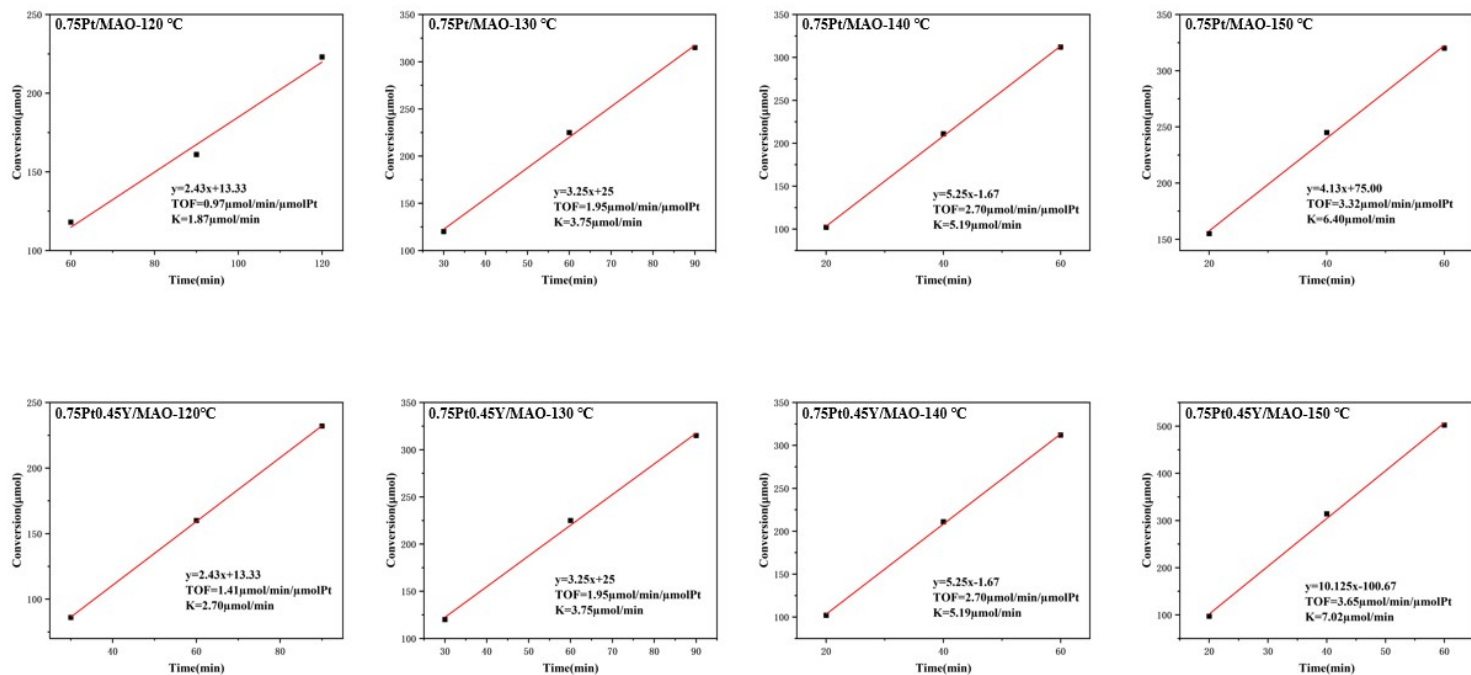

**Figure S10** TOF values under different temperature over 0.75Pt/MAO and 0.75Pt0.45Y/MAO catalysts.

Reaction conditions: 0.1 g of FFA in 4 g of water, 1 MPa H<sub>2</sub>, 50 mg of 0.75Pt/MAO, temperature range of 120–150 °C or 50 mg of 0.75Pt0.45Y/MAO, temperature range of 120–150 °C

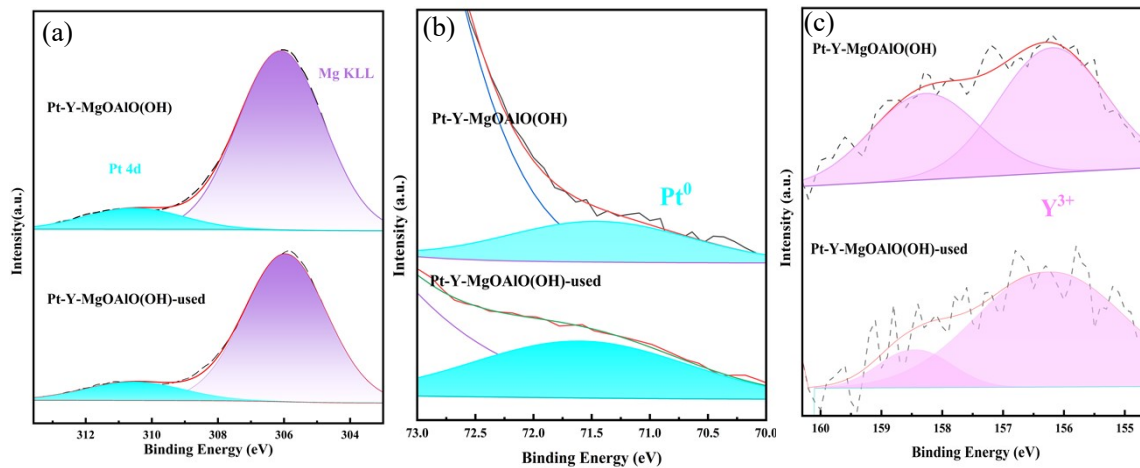

**Figure S11** XPS (a) Pt 4d, (b) Pt 4f and (c) Y 3d spectra of different Pt–Y/MAO catalysts.

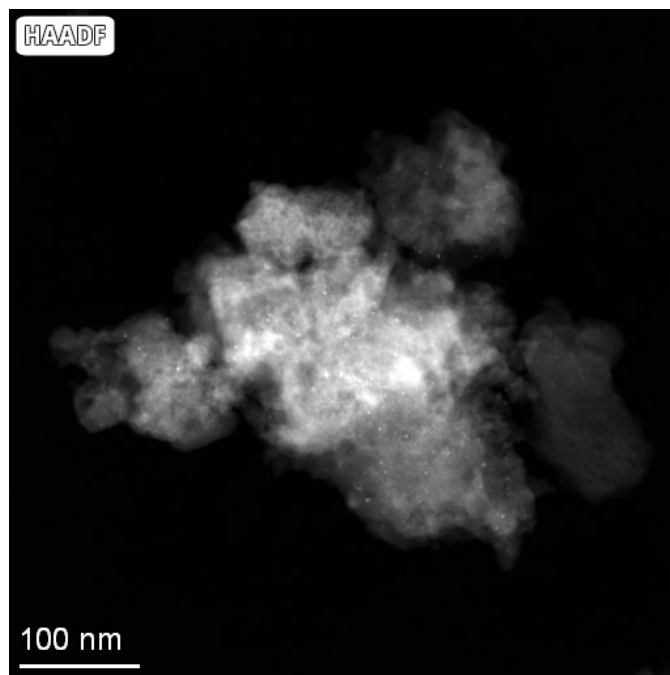

**Figure S12** HRTEM image of used 0.75Pt-0.45Y/MAO catalyst

**Table S1** The amount of Pt · Y in the impregnation solution.

| Catalyst        | Concentration of Pt | Concentration of Y |
|-----------------|---------------------|--------------------|
| 0.75Pt/MAO      | 0.712%              | -                  |
| 0.75Pt0.45Y/MAO | 0.715%              | 0.478%             |

**Table S2** Basic physical-chemical properties of different catalysts

| Catalyst        | H <sub>2</sub> uptake ( $\mu\text{mol}_{\text{H}_2} \text{g}_{\text{cat}}^{-1}$ ) | Total alkali content ( $\text{mmol}_{\text{Na}} \text{g}_{\text{cat}}^{-1}$ ) | CO Cumulative Quantity ( $\mu\text{mol}_{\text{CO}} \text{g}_{\text{cat}}^{-1}$ ) |
|-----------------|-----------------------------------------------------------------------------------|-------------------------------------------------------------------------------|-----------------------------------------------------------------------------------|
| 0.45Y/MAO       | 95.7                                                                              | -                                                                             | -                                                                                 |
| 0.75Pt/MAO      | 431                                                                               | 6.56                                                                          | 12.19                                                                             |
| 0.75Pt0.45Y/MAO | 196                                                                               | 4.02                                                                          | 9.51                                                                              |

**Table S3** Catalytic performance of the 0.75Pt0.45Y/MAO catalyst for the THFA hydrogenolysis.

| Entry | Conversion (%) | Selectivity (%) |         |
|-------|----------------|-----------------|---------|
|       |                | 1,2-PeD         | 1,5-PeD |
| 1     | 0              | 0               | 0       |

Reaction conditions: 0.1 g THFA in 4 mL H<sub>2</sub>O, 50 mg catalyst, 1 MPa H<sub>2</sub> and 140 °C for 6h.

**Table S4.** Carbon balance for FFA hydrogenolysis over 0.75Pt0.45Y/MAO catalyst

| Reaction conditions | Conversion (%) | Selectivity (%) |         |      |       | Carbon balance (%) |
|---------------------|----------------|-----------------|---------|------|-------|--------------------|
|                     |                | 1,2-PeD         | 1,5-PeD | THFA | Other |                    |
| 1                   | 100            | 80.3            | 10      | 7.6  | 2     | 97.9               |

**Table S5.** Comparison of conversion rates between catalyst in excess and catalyst in insufficient amount in a fixed-bed reactor

| Entry | catalyst (g) | Conversion (%) |
|-------|--------------|----------------|
| 1     | 1            | 90             |
| 2     | 2            | 100            |
